# Supplementary material for: Potential solution-induced HfAlO dielectrics and their applications in low-voltage-operating transistors and high-gain inverters
Source: Royal Society of Chemistry journal article supplement (doi:10.1039/c8ra07813k), 2018-01-01
Supplement: c8ra07813k1.pdf [file c8ra07813k1.pdf]

Potential solution-induced HfAlO dielectrics and their applications in  
low-voltage-operating transistors and high-gain inverters

Gang He<sup>a,b\*</sup>, Wendong Li<sup>a</sup>, Zhaoqi Sun<sup>a</sup>, Miao Zhang<sup>a</sup>, and Xiaoshuang Chen<sup>c</sup>

*<sup>a</sup>School of physics and Materials Science, Radiation Detection Materials & Devices  
Lab, Anhui University, Hefei 230601, P.R. China*

*<sup>b</sup>Institute of Physical Science and Information Technology, Anhui University, Hefei  
230601, P.R. China*

*<sup>c</sup>National Laboratory for Infrared Physics, Chinese Academy of Sciences, Shanghai  
Institute of Technical Physics, 500 Yutian Road, Shanghai 200083, P.R. China*

---

\*Email: [hegang@ahu.edu.cn](mailto:hegang@ahu.edu.cn)

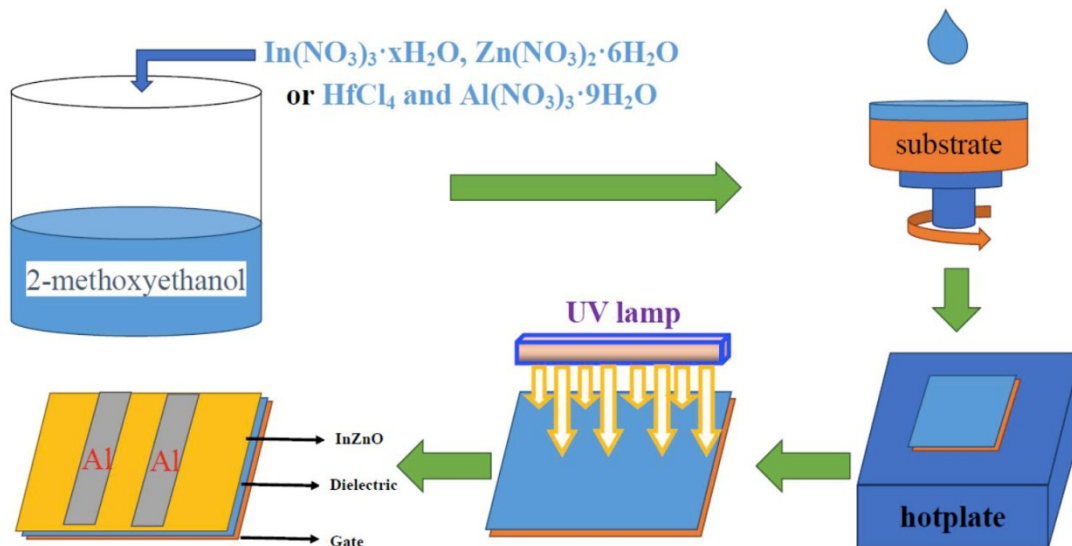

Fig. S1. Schematic diagram of solution-derived IZO and  $\text{HfAlO}_x$  thin films and IZO TFTs device fabrication.

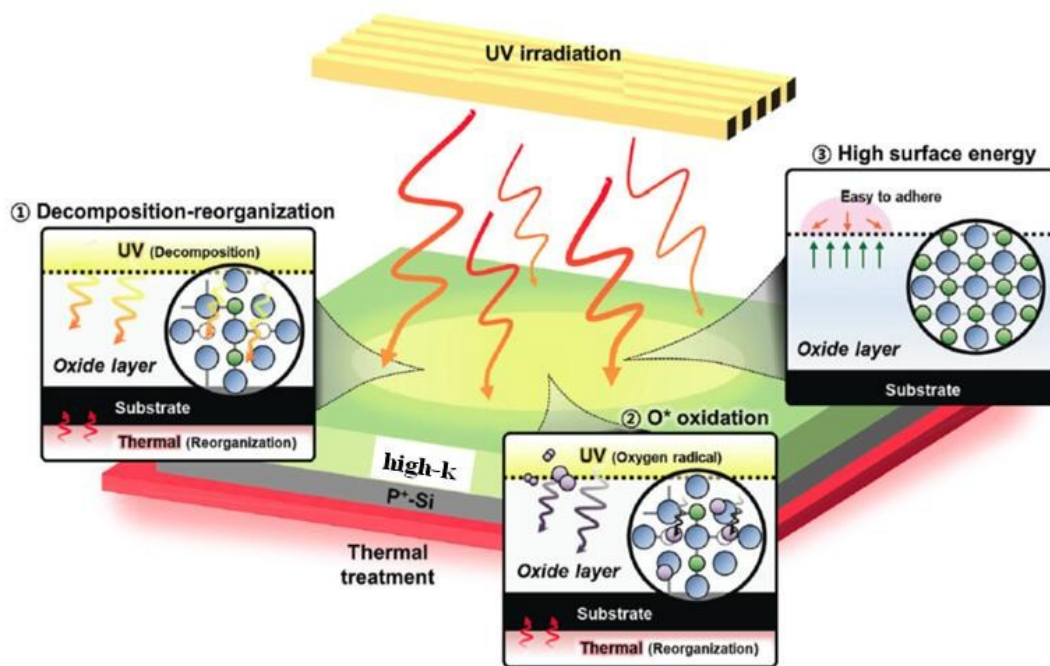

Fig. S2. Illustrated physical and chemical mechanisms of UV treatment.<sup>[1]</sup>

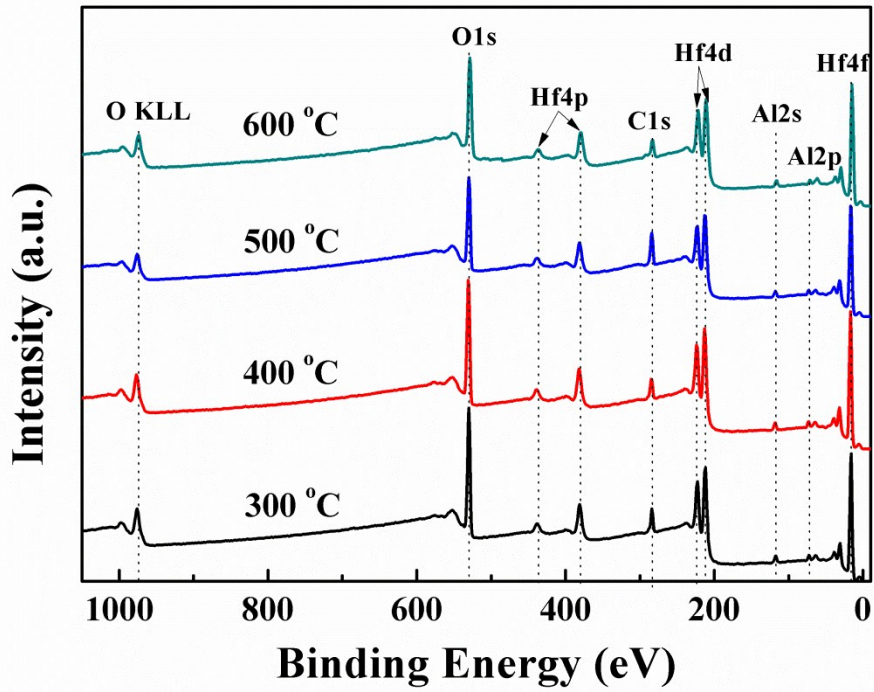

Fig. S3. XPS survey spectra of the HfAlO<sub>x</sub> films as a function of annealing temperature.

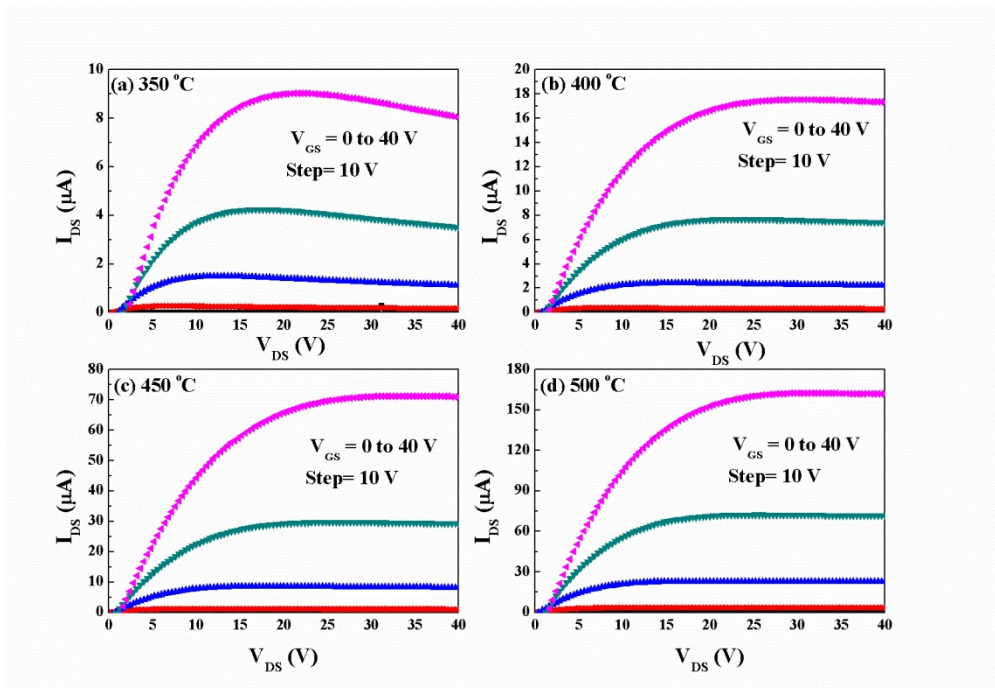

Fig. S4. The output characteristics of the IZO/SiO<sub>2</sub> TFTs as a function of annealing temperature.

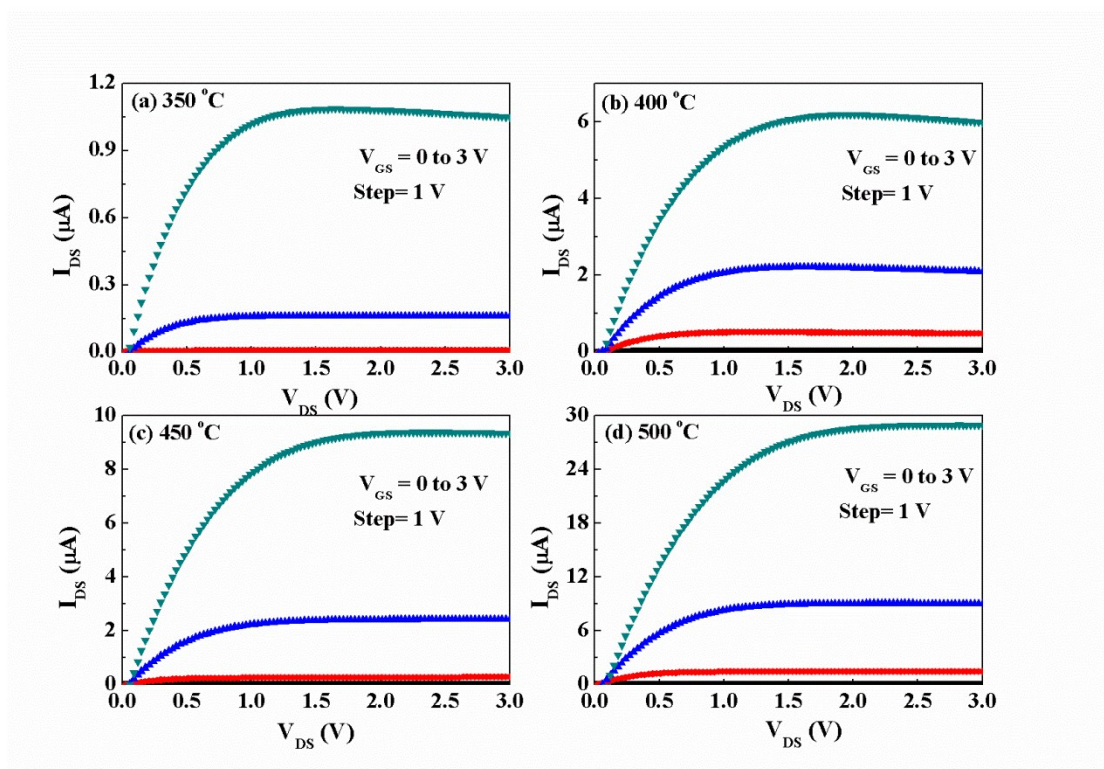

Fig. S5. The output characteristics of the IZO/HfAlO<sub>x</sub> TFTs as a function of annealing temperature.

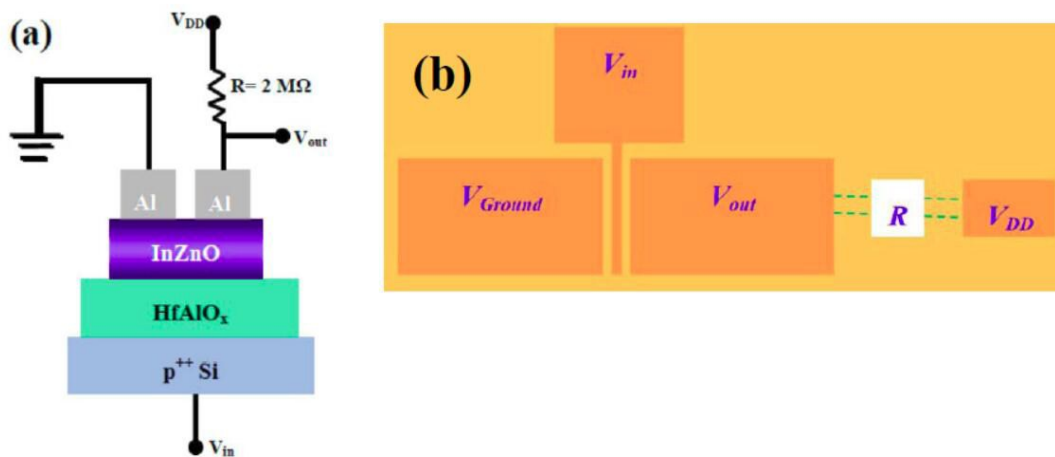

Fig. S6. The schematic diagrams (a) and top views (b) of the unipolar resistor-loaded inverter coupled with 450°C-annealed IZO/HfAlO<sub>x</sub> TFTs.

[1] Y. J. Tak, S. J. Kim, S. Kwon, H. J. Kim, K. B. Chung and H. J. Kim, *J. Mater.*

*Chem. C*, 2018, 6, 249.
